# Supplementary material for: RepeatFiller newly identifies megabases of aligning repetitive sequences and improves annotations of conserved non-exonic elements
Source: PubMed Central journal article supplement (PMC6862929; doi:10.1093/gigascience/giz132), 2019-11-19
Supplement: giz132_response_to_reviewer_comments_original_submission.pdf [file giz132_response_to_reviewer_comments_original_submission.pdf]

## Author's Response To Reviewer Comments

Close

We have uploaded the point-by-point response as a separate pdf document in the category supplementary Data, but labeled as 'PointByPointResponse'.

Close
